# Supplementary material for: Discovery and vertical transmission analysis of Dabieshan Tick Virus in Haemaphysalis longicornis ticks from Chengde, China
Source: Front Microbiol. 2024 Feb 26;15:1365356. doi: 10.3389/fmicb.2024.1365356 (PMC10925692; doi:10.3389/fmicb.2024.1365356)
Supplement: Supplementary file 1 [file Table_1.XLSX]

## Sheet: Sample Information
species	Locationg	Conditions	Date	Season	Life Stage	Number	Dection Methoud
H. longicornis	Chengde, Hebei Province	Sheep	2021	Spring	Nymph	27	sRNA-seq
H. longicornis	Yongcheng, Henan Province	Vegetation	2022	Summer	Adult	44	sRNA-seq
H. longicornis	Chengde, Hebei Province	Vegetation	2022	Summer	Nymph	200	PCR
H. longicornis	Chengde, Hebei Province	Sheep	2022	Spring	Adult	16	PCR
H. longicornis	Chengde, Hebei Province	Laboratory	2022	/	Egg	14 pools	PCR
H. longicornis	Chengde, Hebei Province	Laboratory	2022	/	Larva	7 pools	PCR
