# Supplementary material for: Discovery and vertical transmission analysis of Dabieshan Tick Virus in Haemaphysalis longicornis ticks from Chengde, China
Source: Front Microbiol. 2024 Feb 26;15:1365356. doi: 10.3389/fmicb.2024.1365356 (PMC10925692; doi:10.3389/fmicb.2024.1365356)
Supplement: Supplementary file 2 [file Table_2.XLSX]

## Sheet: Sheet1
Name	Order（5’-3’）
DBTV-S-F1	CCCCTACCTTCTTTCCTTTAACAC
DBTV-S-R1	TCCTTGGTCCAGTTGCGGT
DBTV-S-F2	CCACCACATGGGGATGAATCTG
DBTV-S-R2	CGTGAAAGTGCTGCCGTAGC
DBTV-S-F3	GTTGAGCTCACCAAGGTGATC
DBTV-S-R3	CTCCAGCCCAACCCTGACAC
DBTV-S-F4	GCTTCAACCGTTAGGACAGAC
DBTV-S-R4	CTCTTATGTGGGGGTAATCGGT
